# Supplementary material for: Involvement of sphingosine-1-phosphate receptors 2/3 in IR-induced sudden cardiac death
Source: Springer Nature journal article supplement (doi:10.1007/s00380-018-01323-8), 2019-01-02
Supplement: MOESM1 [file 16369876]

| HR | T0 | T1 | T2 | T3 | T4 |
| --- | --- | --- | --- | --- | --- |
| Control | 352.60±19.54 | 318.80±11.39 | 311.40±35.75 | 308.50±35.65 | 311.00±35.55 |
| Sham | 369.75±23.58 | 350.75±17.72 | 317.25±21.03 | 331.00±54.09 | 311.00±33.15 |
| IR | 331.20±32.10 | 275.57±28.40ab | 251.67±28.07ab | 252.67±40.13ab | 222.83±35.03ab |
| DMSO+IR | 350.40±11.27 | 280.75±21.09ab | 251.50±32.52ab | 240.50±41.56ab | 227.33±64.66ab |
| S1PR2 agonist +IR | 418.00±16.70acd | 369.00±48.28cd | 366.00±46.94acd | 357.67±14.57cd | 349.33±30.62cd |
| S1PR3 agonist +IR | 346.33±37.61 | 297.00±42.04 | 258.00±13.00ab | 234.00±15.95ab | 220.33±17.79ab |
| S1PR2 antagonist+IR | 359.33±38.85 | 432.67±22.81abcd | 420.67±57.05abcd | 378.00±84.89cd | 377.33±87.96c |
| S1PR3 antagonist+IR | 353.00±39.99 | 311.14±41.85b | 296.71±25.58cd | 282.71±23.72 | 245.33±45.69ab |
| S1PR2/3 agonist+IR | 457.00±15.72abcd | 458.67±3.06abcd | 439.33±4.04abcd | 416.00±29.46abcd | 431.00±36.35abcd |
| S1P2/3 antagonist+IR | 324.42±55.16 | 276.57±48.89ab | 216.29±39.06ab | 194.86±35.36abc | 153.25±24.66abcd |
| LVSP | T0 | T1 | T2 | T3 | T4 |
| Control | 121.20±19.53 | 118.62±23.54 | 115.54±17.10 | 113.91±19.97 | 115.88±19.16 |
| Sham | 125.16±25.46 | 136.39±24.13 | 127.22±9.13 | 129.71±6.23 | 128.01±10.99 |
| IR | 135.42±25.91 | 114.73±15.70 | 118.80±23.06 | 122.49±25.91 | 116.06±26.21 |
| DMSO+IR | 131.94±14.05 | 117.66±5.20 | 120.86±4.72 | 120.50±9.32 | 110.49±22.18 |
| S1PR2 agonist +IR | 115.84±17.56 | 96.04±7.05 | 93.92±22.71 | 81.99±7.90 | 90.80±15.28 |
| S1PR3 agonist +IR | 144.74±20.73 | 126.33±7.41 | 108.41±12.23 | 115.56±21.29 | 115.41±1.21 |
| S1P2 antagonist+IR | 118.98±23.07 | 96.89±18.48 | 95.57±23 | 97.26±17.66 | 93.78±14.58 |
| S1P3 antagonist+IR | 127.32±18.74 | 120.15±12.26 | 123.35±19.00 | 120.48±15.48 | 104.10±17.65 |
| S1P2/3 agonist+IR | 139.87±32.39 | 113.33±4.69 | 114.43±14.08 | 112.11±6.39 | 107.71±9.43 |
| S1P2/3 antagonist+IR | 147.12±25.76 | 129.93±19.26 | 121.82±12.87 | 119.03±25.58 | 114.61±18.22 |
| LVEDP | T0 | T1 | T2 | T3 | T4 |
| Control | 2.08±4.68 | 3.51±2.76 | 4.29±3.53 | 2.26±4.50 | 1.07±4.45 |
| Sham | 4.26±5.43 | 1.59±4.59 | -0.52±4.03 | -2.96±5.41 | -0.60±6.59 |
| IR | 2.78±4.12 | 2.77±3.42 | 6.20±2.71b | 4.21±3.24b | 5.73±3.02 |
| DMSO+IR | 2.53±4.03 | -0.05±4.92 | 1.90±2.06 | 2.17±1.16 | 6.47±1.79 |
| S1PR2 agonist +IR | -1.12±3.87 | 1.88±4.03 | 7.60±2.75b | 6.87±3.41b | 6.07±4.22 |
| S1PR3 agonist +IR | 6.44±1.66 | 5.49±4.98 | 8.55±3.62b | 7.75±1.87b | 5.94±2.96 |
| S1PR2 antagonist+IR | 3.70±8.67 | 7.09±3.94 | 6.71±6.83 | 9.43±3.99ab | 9.61±8.77 |
| S1PR3 antagonist+IR | 4.63±6.49 | 3.92±5.49 | 6.31±7.55 | 9.33±8.27ab | 9.76±6.44ab |
| S1P2/3 agonist+IR | -2.67±8.51 | 5.62±5.58 | 7.90±4.02b | 9.88±5.87ab | 9.75±5.49ab |
| S1P2/3 antagonist+IR | 5.26±5.81 | 8.26±2.85 | 8.62±4.70bd | 9.53±3.68ab | 10.97±4.75ab |
| dp/dtmax(mmHg/s) | T0 | T1 | T2 | T3 | T4 |
| Control | 3399.17±470.53 | 3146.48±543.13 | 2905.03±484.07 | 3110.05±865.00 | 3037.10±901.22 |
| Sham | 4117.43±872.70 | 4032.39±887.17 | 4554.85±212.63 | 4582.52±366.34 | 4583.33±362.54 |
| IR | 4370.36±720.99 | 3350.83±610.37 | 3177.73±845.49 | 3387.45±997.87 | 3067.38±852.68 |
| DMSO+IR | 4371.43±1156.67 | 3450.25±710.82 | 3340.27±499.25 | 3274.05±596.82 | 3195.49±631.92 |
| S1P2 agonist +IR | 4795.99±631.61 | 3510.72±349.06 | 3160±1179.13 | 2659±630.59 | 3434.38±631.66 |
| S1P3 agonist +IR | 4192.50±686.99 | 3217.16±320.27 | 3250.73±132.93 | 3533.53±1119.58 | 3146.97±923.43 |
| S1P2 antagonist+IR | 4165.00±675.48 | 3850.09±418.90 | 3884.52±70.74 | 3889.21±394.35 | 3238.15±532.71 |
| S1P3 antagonist+IR | 3976.68±1346.78 | 3660.07±1283.274 | 3372.40±1351.759 | 2968.91±1184.16 | 2749.38±1017.03 |
| S1P2/3 agonist+IR | 5627.90±516.94 | 4601.87±179.18 | 4192.16±458.80 | 4122.67±365.86 | 4059.44±338.35 |
| S1P2/3 antagonist+IR | 4166.46±521.73 | 3161.73±705.65 | 2599.08±820.45 | 2889.81±536.57 | 2448.32±1086.06 |
| -dp/dtmax(mmHg/s) | T0 | T1 | T2 | T3 | T4 |
| Control | -2919.43±534.78 | -2677.97±579.70 | -2509.16±460.42 | -2570.19±708.82 | -2532.15±833.14 |
| Sham | -3587.04±908.19 | -3088.79±165.91 | -2947.18±286.27 | -3149.82±480.76 | -3297.93±864.81 |
| IR | -4403.69±252.38 | -2672.12±460.477 | -2510.17±752.81 | -2768.76±820.87 | -2800.54±623.92 |
| DMSO+IR | -3632.20±721.04 | -3128.36±911.96 | -3132.93±760.37 | -3106.99±848.251 | -2449.95±111.22 |
| S1P2 agonist +IR | -4704.61±564.34 | -3840.26±357.60 | -3643.06±636.27 | -3048.52±137.08 | -3446.27±571.99 |
| S1P3 agonist +IR | -4211.73±938.18 | -2896.73±202.24 | -2379.76±609.64 | -2578.13±1210.19 | -2506.51±898.98 |
| S1P2 antagonist+IR | -3911.43±568.76 | -2999.95±294.86 | -3217.49±323.75 | -3599.34±621.45 | -3501.37±358.47 |
| S1P3 antagonist+IR | -3686.52±1194.86 | -3140.38±589.04 | -2891.85±904.63 | -2694.82±1142.63 | -2274.66±612.29 |
| S1P2/3 agonist+IR | -4494.87±375.47 | -3524.19±319.83 | -3384.59±160.15 | -3309.15±445.54 | -3297.88±236.39 |
| S1P2/3 antagonist+IR | -3936.42±662.11 | -2682.20±598.60 | -2365.37±634.90 | -2629.80±476.24 | -1938.48±637.09 |
